# Supplementary material for: Novel Time-Lapse Parameters Correlate with Embryo Ploidy and Suggest an Improvement in Non-Invasive Embryo Selection
Source: MDPI journal article supplement (doi:10.3390/jcm12082983), 2023-04-19
Supplement: s1 [file s1]

**Table S1.** Nomenclature of morphokinetic dynamic events.

|                     |                                                                                                                                             |
|---------------------|---------------------------------------------------------------------------------------------------------------------------------------------|
| $t_0$               | Time of IVF or mid-point of micro/injection (ICSI)                                                                                          |
| $t_{PB2}$           | The second polar body is completely detached from the oolemma                                                                               |
| $t_{PN}$            | Fertilization status is confirmed by the appearance of first PN                                                                             |
| $t_{PNf}$           | The time when both (and the last) PNs are no longer visible                                                                                 |
| $t_n$               | First time frame at which an embryo reaches n number of blastomeres                                                                         |
| $st_2$              | First evidence of cytoplasmatic movements prior to first cytokinesis (Video S1)                                                             |
| $ts_c$              | First evidence of compaction                                                                                                                |
| $t_M$               | Time of completion of compaction process *                                                                                                  |
| $ts_B$              | Initiation of blastulation (first frame in which the blastocoel is visible)                                                                 |
| $t_B$               | Full blastocyst (blastocoele cavity fills the embryo and the inner cell mass and trophectoderm tissues are distinguishable from each other) |
| $cc1 (t_2-t_{PNf})$ | Duration of first cell cycle                                                                                                                |
| $cc2 (t_3-t_2)$     | Duration of second cell cycle                                                                                                               |
| $cc3 (t_5-t_3)$     | Duration of the third cell cycle                                                                                                            |
| $t_5-t_2$           | Interval between 2 and 5 cells (which combines the concepts of cell cycle and synchrony)                                                    |
| $s2 (t_4-t_3)$      | Synchronization of cell divisions (synchronicity of the two blastomere divisions within the second cell cycle)                              |
| $s3 (t_8-t_5)$      | Synchronization of cleavage pattern (the synchronicity of the four blastomere divisions within the third cell cycle)                        |
| $t_B-t_{SB}$        | Duration of blastulation                                                                                                                    |

Note: Table adapted from [8]. Some of the times may change from one study to another depending on the  $t_0$  used and the normalization applied. These inconsistencies must be taken into account when using time-lapse-derived models and algorithms. \* Times regarding morula formation may be difficult to use as strict marking times as cells may continue fusing and being excluded even after the start of cavitation, which hardens the annotation of the real  $t_M$  time. Therefore, other authors and we consider it difficult to use  $t_M$  in algorithms or models when predicting euploidy or other outcomes [8].

**Table S2.** Baseline characteristics of patients involved in the study.

|                                              |                   | Euploid          | Aneuploid        | <i>p</i> -Value |
|----------------------------------------------|-------------------|------------------|------------------|-----------------|
| No. of patients                              | 75                |                  |                  |                 |
| No. of PGT cycles                            | 85                |                  |                  |                 |
| Female age (years) (95% CI)                  | 38.0 (37.6–38.4)  | 37.8 (37.3–38.3) | 38.8 (38.4–39.2) | 0.002           |
| Fertilization technique                      |                   |                  |                  |                 |
| IVF (cycles; embryos)                        | 49; 202           | 77 (38.1%)       | 125 (61.9%)      | ns              |
| ICSI (cycles; embryos)                       | 36; 172           | 81 (47.1%)       | 91 (52.9%)       |                 |
| Day of biopsy                                |                   |                  |                  |                 |
| D5                                           | 299               | 129 (81.6%)      | 170 (18.4%)      | ns              |
| D6                                           | 75                | 29 (78.7%)       | 46 (21.3%)       |                 |
| Indication                                   |                   |                  |                  |                 |
| AMA (cycles (%))                             | 53 (62.4%)        |                  |                  |                 |
| RPL (cycles (%))                             | 7 (8.2%)          |                  |                  |                 |
| AMA + RPL (cycles (%))                       | 11 (12.9%)        |                  |                  |                 |
| RIF (cycles (%))                             | 3 (3.5%)          |                  |                  |                 |
| Altered karyotype (cycles (%))               | 10 (11.8%)        |                  |                  |                 |
| Elective (cycles (%))                        | 1 (1.2%)          |                  |                  |                 |
| No. of embryos analyzed (mean per cycle; SD) | 374 (4.4; 2.6)    |                  |                  |                 |
| Mean number of euploid embryos per cycle     | 1.8 ± 1.8         |                  |                  |                 |
| Euploidy rate per cycle (95% CI)             | 38.3% (31.4–45.0) |                  |                  |                 |
| Aneuploidy rate per cycle (95% CI)           | 61.7% (55.0–68.5) |                  |                  |                 |

Note: PGT: preimplantation genetic testing; IVF: in vitro fertilization; ICSI: intracytoplasmic sperm injection; AMA: advanced maternal age; RPL: recurrent pregnancy loss; RIF: recurrent implantation failure; ns: not significant.
