# Supplementary material for: Novel Time-Lapse Parameters Correlate with Embryo Ploidy and Suggest an Improvement in Non-Invasive Embryo Selection
Source: MDPI journal article supplement (doi:10.3390/jcm12082983), 2023-04-19
Supplement: s1 [file s1]

**Video S1.** *Start of  $t_2$  ( $st_2$ ).* Video shows the first cytoplasmic movements prior to first cytokinesis. Hours indicated in the video (top left) refer to hours post-insemination without normalization.  $St_2$  and  $t_2$  (red and blue, respectively) are indicated with the specific time appearing at the right side of the embryo when the phenomena are taking place.

**Video S2.** *Pattern 0 embryo examples.* Example of two embryos classified in pattern 0 group. No halo disappearance prior to the first cell cleavage is detected; cells are divided maintaining the cytoplasmic halo.

**Video S3.** *Pattern 1 embryo examples.* Representative videos of three embryos displaying pattern 1  $st_2$ . A: Halo disappearance is visible simultaneously to PN breakout, followed by smooth cell cleavage. B: embryo presents halo disappearance followed by non-patterned cytoplasmic movements. C: Chaotic cytoplasmic waves can be observed before direct unequal cleavage.

**Video S4.** *Pattern 2 embryo examples.* Representative time-lapse videos of embryos classified as pattern 2. A: Clockwise circular wave observed prior to first cell division, 3 complete rounds observed. B: Embryo presents membrane smooth blebbing prior to counterclockwise circling movements (2 turns observed), followed by cell division.
