# Supplementary material for: Novel Time-Lapse Parameters Correlate with Embryo Ploidy and Suggest an Improvement in Non-Invasive Embryo Selection
Source: J Clin Med. 2023 Apr 19;12(8):2983. doi: 10.3390/jcm12082983 (PMC10146271; doi:10.3390/jcm12082983)
Supplement: Supplementary file 1 [file jcm-12-02983-s001.zip]

Archive with 6 entries (6 files):
- jcm-2310309-supplementary.pdf
- Video captions.pdf
- Video S1.mp4
- Video S2.mp4
- Video S3.mp4
- Video S4.mp4
